# Supplementary material for: Molecular architecture and functional dynamics of the pre-incision complex in nucleotide excision repair
Source: PubMed Central journal article supplement (PMC11445577; doi:10.1038/s41467-024-52860-y), 2024-10-01
Supplement: 41467_2024_52860_MOESM3_ESM.pdf [file 41467_2024_52860_MOESM3_ESM.pdf]

## Description of Additional Supplementary Files

File Name: Supplementary Data 1

Description: **The final configuration of the PInC molecular dynamics trajectory provided in PDB format.**

File Name: Supplementary Movie 1

Description: **Structural organization of the PInC assembly.** The PInC assembly is colored by subunits. XPG, XPF/ERCC1 and DNA are shown in cartoon representation. TFIIH, XPA and RPA are shown in surface representation. The lesion containing DNA strand is shown in cyan; the undamaged strand is shown in blue.

File Name: Supplementary Movie 2

Description: **Mapping of XP and XP/CS disease mutations onto the PInC community structure.** Dynamic communities from network analysis are colored as denoted in Fig. 6. Human disease mutations are represented as spheres and colored by phenotype.

File Name: Supplementary Movie 3

Description: **Mapping of XP and XP/CS disease mutations onto the PInC community structure.** Dynamic communities from network analysis are colored as denoted in Fig. 6. Human disease mutations are represented as spheres and colored by Rosetta ddG score – proxy for protein stability.
